# Supplementary material for: An Almond-Based Low Carbohydrate Diet Improves Depression and Glycometabolism in Patients with Type 2 Diabetes through Modulating Gut Microbiota and GLP-1: A Randomized Controlled Trial
Source: Nutrients. 2020 Oct 3;12(10):3036. doi: 10.3390/nu12103036 (PMC7601479; doi:10.3390/nu12103036)
Supplement: Supplementary file 1 [file nutrients-12-03036-s001.pdf]

**Supplementary Table S1.** ITT of glycated hemoglobin (%) between the two groups.

| Study period | a-LCD (n=25)                  | LFD (n=25)                    | t/F                 | p       |
|--------------|-------------------------------|-------------------------------|---------------------|---------|
| Baseline     | 7.64±1.50                     | 7.54±1.25                     | -0.246 <sup>a</sup> | 0.807   |
| Third month  | 6.91±1.00(adjusted:6.88±0.12) | 7.38±1.24(adjusted:7.42±0.12) | 9.997 <sup>b</sup>  | <0.01** |
| t            | 3.911 <sup>c</sup>            | 2.587 <sup>c</sup>            |                     |         |
| p            | <0.01**                       | 0.016*                        |                     |         |

<sup>a</sup> Independent-samples T test for between-group differences at the baseline; <sup>b</sup> covariance analysis for between-group differences at the third month, with adjusted data presented as mean±standard error (covariate: age, baseline HbA1c, protein, the rate of change of anti-diabetics); <sup>c</sup> paired sample T test for within-group difference.

\*  $p < 0.05$ ; \*\*  $p < 0.01$ ; ITT: intention-to-treat.

**Supplementary Table S2.** ITT of depression scores between the two groups .

| Study period | a-LCD (n=25)                    | LFD (n=25)                      | t/F                 | p       |
|--------------|---------------------------------|---------------------------------|---------------------|---------|
| Baseline     | 48.38±7.53                      | 49.59±8.10                      | 0.544 <sup>a</sup>  | 0.589   |
| Third month  | 42.81±5.79(adjusted:43.22±0.89) | 48.74±7.37(adjusted:48.33±0.89) | 15.596 <sup>b</sup> | <0.01** |
| t            | 5.627 <sup>c</sup>              | 0.839 <sup>c</sup>              |                     |         |
| p            | <0.01**                         | 0.410                           |                     |         |

<sup>a</sup> Independent-samples T test for between-group differences at the baseline; <sup>b</sup> covariance analysis for between-group differences at the third month, with adjusted data presented as mean±standard error (covariate: age, baseline depression scores, protein); <sup>c</sup> paired sample T test for within-group difference. \*  $p < 0.05$ ; \*\*  $p < 0.01$ ;

ITT: intention-to-treat.

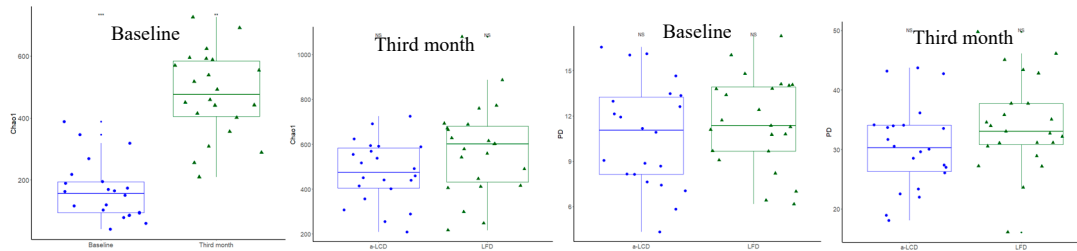

**Supplementary Figures S1.** The Comparison of Chao 1 and PD between the two groups (NS: no significant difference)

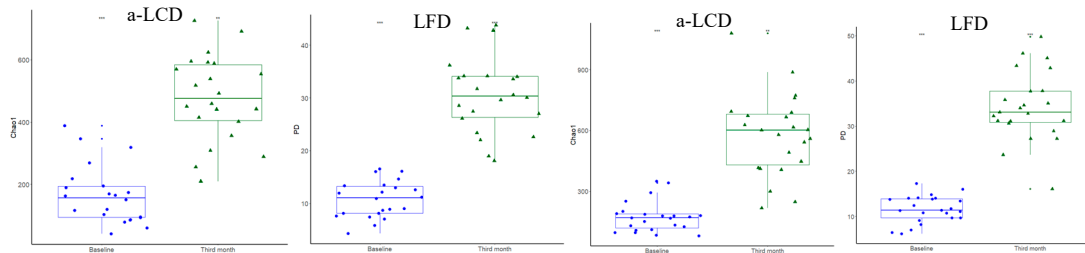

**Supplementary Figures S2.** The Comparison of Chao 1 and PD within the groups ( \*\*  $p < 0.05$ ; \*\*\*  $p < 0.01$ )

B

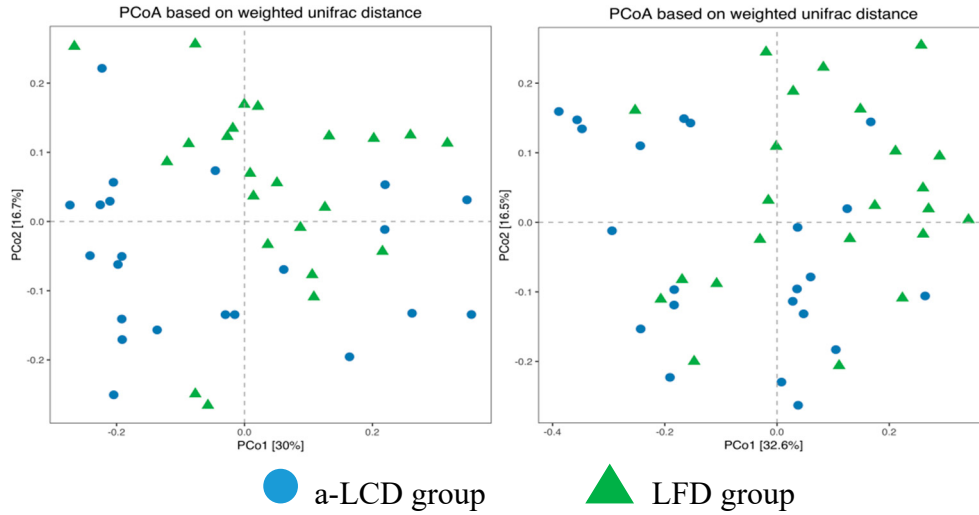

**Supplementary Figure S3.** Comparison of beta-diversity of gut microbiota between two groups (A:Baseline; B:Third month).

B

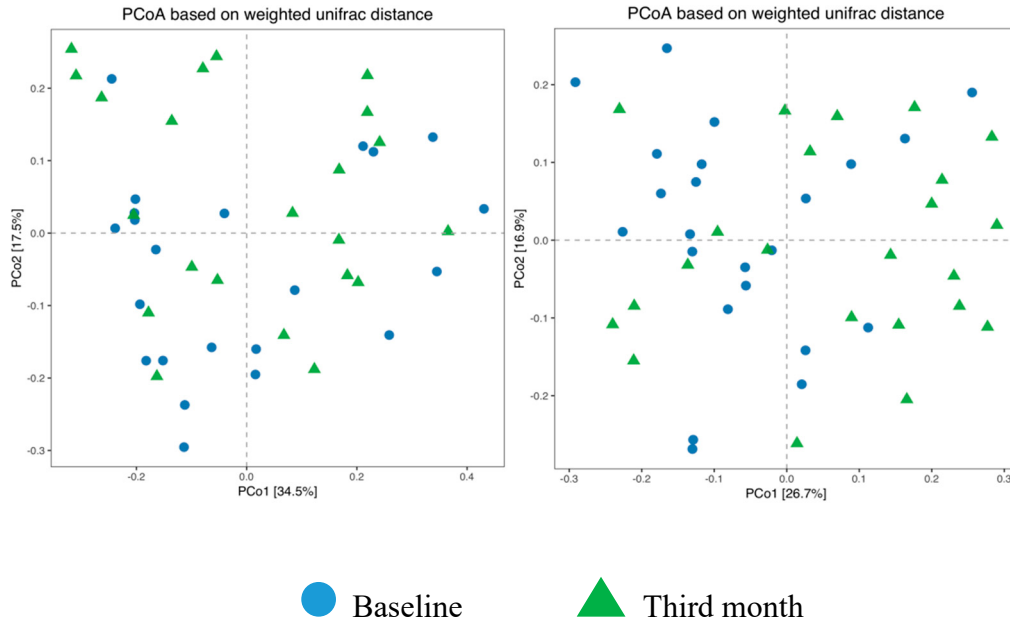

**Supplementary Figure S4.** Comparison of Beta-diversity of gut microbiota within the group (A: a-LCD group; B: LFD group). The abscissa represents the first principal component, and the percentage represents the contribution value of the first principal component to the sample difference; the ordinate represents the second principal component, and the percentage represents the contribution value of the second principal component to the sample difference. Each point in the graph represents a sample, and the samples of the same group are represented by the same color.
